# Supplementary material for: Exercise Reverses Dysregulation of T-Cell-Related Function in Blood Leukocytes of Patients With Parkinson's Disease
Source: Front Neurol. 2020 Jan 28;10:1389. doi: 10.3389/fneur.2019.01389 (PMC6997272; doi:10.3389/fneur.2019.01389)
Supplement: Table S9 — KEGG analysis for differentially expressed genes between new-onset Parkinson's disease and 6 months follow-up. [file Table_9.XLSX]

## Sheet: PPMI PD KEGG
Supplementary files:
Table S9. KEGG analysis for differentially expressed genes between new-onset Parkinson's disease and 6 months follow-up
Significantly over-represented KEGG pathways in PD after 6 months
KEGGID	pBH	ExpCount	Count	Term	Symbols
Up-regulated KEGG pathways in PD after 6 months
4142	5.42e-06	36.9865	64	Lysosome	ABCA2;ACP2;ACP5;AP1B1;ARSA;ARSB;ATP6V0C;ATP6V0B;AP1S1;TPP1;CLTA;CLTB;CTNS;CTSB;CTSD;CTSE;CTSG;CTSH;CTSK;CTSW;CTSZ;DNASE2;FUCA1;GAA;GBA;GLB1;GM2A;GUSB;HEXB;IDUA;M6PR;MAN2B1;NAGA;NAGLU;NPC1;CTSA;PPT1;SGSH;SLC11A1;CLTCL1;CTSF;AP1M1;AP3D1;ATP6V0D1;AP4M1;PPT2;NAPSA;ENTPD4;AP3S2;TCIRG1;AP4B1;AP4S1;ARSG;GGA2;ABCB9;ATP6V0A2;GGA1;SLC17A5;AP3M1;NAGPA;MCOLN1;GNPTG;ATP6V0D2;SUMF1
1100	5.42e-06	345.411	417	Metabolic pathways	NAT1;NAT2;ACACB;ACADS;ACADVL;ACLY;ACO2;ACY1;ADA;AK1;AK2;ALAD;ALAS2;ALDH1B1;ALDH3B1;ALDH3A2;ALDOA;AKR1B1;ALOX5;ALOX15B;ALPL;AMPD2;AMPD3;AMT;ANPEP;AOC2;AOX1;ARSB;ASL;ATP6V0C;ATP6V0B;ATP6V1G2;BCAT2;BCKDHA;BDH1;POLR3D;BTD;CAT;CBR1;KYAT1;CHKA;CHKB;COMT;CPOX;CTPS1;CYC1;CYP2C9;CYP4A11;CYP11A1;DGKQ;DCTD;DDOST;DGUOK;DHCR7;DHFR;DHODH;DLST;SARDH;DNMT1;DPAGT1;DTYMK;DUT;TYMP;ENO3;EPHX2;EXT1;EXT2;FAH;FDFT1;FDP…
4380	7.13e-06	39.1263	66	Osteoclast differentiation	ACP5;AKT1;AKT2;BTK;CSF1;CSF1R;CTSK;FCGR2A;FHL2;FOS;FOSB;FYN;GRB2;IFNGR2;IL1B;JAK1;JUN;JUNB;JUND;LCK;LCP2;NCF2;NFKB2;NFKBIA;PIK3CD;PIK3CG;PLCG2;PPP3CC;MAPK1;MAPK3;MAPK11;MAPK9;MAPK13;MAP2K1;MAP2K7;RAC1;RELB;SPI1;STAT1;SYK;TGFB1;TGFBR2;TRAF2;TYK2;SQSTM1;MAP3K14;SOCS3;FCGR2C;LILRB2;SIRPB1;IRF9;TAB1;LILRB1;LILRB4;LILRA1;LILRB3;LILRA2;TAB2;PIK3R5;LILRA4;NOX1;SIRPG;LILRA6;OSCAR;SIRPA;NCF1
4664	0.000668936	24.1482	41	Fc epsilon RI signaling pathway	AKT1;AKT2;BTK;FYN;GRB2;HRAS;LCP2;LYN;PIK3CD;PIK3CG;PLA2G2A;PLA2G5;PLCG1;PLCG2;PRKCA;PRKCB;PRKCD;MAPK1;MAPK3;MAPK11;MAPK9;MAPK13;MAP2K1;MAP2K2;MAP2K7;RAC1;RAC2;RAC3;RAF1;SOS2;SYK;VAV1;VAV2;PLA2G6;JMJD7-PLA2G4B;VAV3;PIK3R5;PLA2G2D;LAT;PLA2G12A;PLA2G2C
4144	0.00220292	61.4404	85	Endocytosis	GRK2;AP2A1;AP2A2;AP2B1;ARRB1;ARRB2;CLTA;CLTB;CSF1R;DNM2;F2R;FLT1;FOLR2;GRK4;GRK5;GRK6;HLA-A;HLA-B;HLA-C;HLA-E;HLA-F;HRAS;HSPA1B;HSPA6;IGF1R;IL2RA;IL2RG;CXCR1;KDR;LDLR;SMAD7;NTRK1;PLD2;PRKCZ;PSD;RAB5A;RAB5C;SH3GL1;TGFB1;TGFB3;TGFBR2;CXCR4;CLTCL1;PIP5K1A;HGS;RAB11B;VPS4B;RAB11FIP3;ACAP1;GIT2;IQSEC1;RNF41;STAMBP;EHD1;SNF8;IQSEC2;PIP5K1C;PSD4;LDLRAP1;ARFGAP3;VPS4A;CHMP2A;GIT1;CHMP4A;EPN1;EHD4;VPS37C;…
4330	0.00262822	14.3667	26	Notch signaling pathway	CREBBP;CTBP1;DTX1;DVL1;DVL3;EP300;KAT2A;HES1;LFNG;MFNG;NOTCH1;NOTCH4;PSEN1;PSEN2;RFNG;KAT2B;NUMBL;NCOR2;MAML1;NCSTN;DLL1;APH1A;MAML3;PSENEN;MAML2;PTCRA
4662	0.00262822	22.9255	37	B cell receptor signaling pathway	AKT1;AKT2;BTK;CD19;FOS;GRB2;HRAS;JUN;LYN;NFATC3;NFKBIA;NFKBIB;NFKBIE;PIK3CD;PIK3CG;PLCG2;PPP3CC;PRKCB;MAPK1;MAPK3;MAP2K1;MAP2K2;RAC1;RAC2;RAC3;RAF1;SOS2;SYK;VAV1;VAV2;IFITM1;BCL10;VAV3;LILRB3;PIK3R5;CARD11;PIK3AP1
4912	0.00262822	30.8731	47	GnRH signaling pathway	ADCY2;ADCY3;ADCY7;ADCY9;ATF4;CACNA1C;CACNA1F;CAMK2G;HBEGF;ELK1;PTK2B;GNA11;GNAQ;GNAS;GRB2;HRAS;ITPR3;JUN;MAP3K1;MAP3K3;MMP2;MMP14;PLA2G2A;PLA2G5;PLCB2;PLD2;PRKACA;PRKCA;PRKCB;PRKCD;MAPK1;MAPK3;MAPK11;MAPK9;MAPK13;MAP2K1;MAP2K2;MAP2K7;RAF1;SOS2;PLA2G6;JMJD7-PLA2G4B;PLCB1;PLA2G2D;PLA2G12A;ADCY4;PLA2G2C
4010	0.00262822	81.9206	107	MAPK signaling pathway	AKT1;AKT2;ARRB1;ARRB2;ATF4;CACNA1C;CACNA1E;CACNA1F;CACNB1;CACNB3;CD14;MAP3K8;CRK;GADD45A;DDIT3;DUSP1;DUSP2;DUSP3;DUSP5;DUSP6;DUSP7;ELK1;FGF11;FGFR1;FLNA;FLNB;FOS;GNA12;MKNK2;GRB2;HRAS;HSPA1B;HSPA6;IL1B;JUN;JUND;MAX;MAP3K1;MAP3K3;MAP3K5;MAP3K11;GADD45B;NFKB2;NTRK1;PDGFB;PLA2G2A;PLA2G5;PPP3CC;PPP5C;PRKACA;PRKCA;PRKCB;MAPK1;MAPK3;MAPK11;MAPK9;MAPK13;MAP2K1;MAP2K2;MAP2K7;PTPN7;MAP4K2;RAC1;RAC2;RAC3;R…
563	0.00262822	7.64185	16	Glycosylphosphatidylinositol(GPI)-anchor biosynthesis	GPLD1;PIGH;GPAA1;DPM2;PIGQ;PIGL;PIGP;PIGT;PIGG;PIGX;PIGV;PIGZ;PIGO;PIGM;PIGS;PIGU
4666	0.00262822	28.7333	44	Fc gamma R-mediated phagocytosis	AKT1;AKT2;AMPH;CRK;DNM2;FCGR2A;GSN;HCK;LIMK1;LYN;PIK3CD;PIK3CG;PLCG1;PLCG2;PLD2;PRKCA;PRKCB;PRKCD;MAPK1;MAPK3;MAP2K1;RAC1;RAC2;RAF1;RPS6KB2;SYK;VASP;VAV1;VAV2;PIP5K1A;PLA2G6;PLPP1;SPHK1;FCGR2C;ARPC1B;WASF2;VAV3;ARPC1A;PIP5K1C;PIK3R5;LAT;SPHK2;ARPC5L;NCF1
4370	0.00262822	23.2312	37	VEGF signaling pathway	AKT1;AKT2;BAD;CASP9;HRAS;KDR;NFATC3;PIK3CD;PIK3CG;PLA2G2A;PLA2G5;PLCG1;PLCG2;PPP3CC;PRKCA;PRKCB;MAPK1;MAPK3;MAPK11;MAPK13;MAP2K1;MAP2K2;RAC1;RAC2;RAC3;RAF1;VEGFA;MAPKAPK3;PLA2G6;JMJD7-PLA2G4B;SPHK1;MAPKAPK2;PIK3R5;PLA2G2D;SPHK2;PLA2G12A;PLA2G2C
5223	0.00311034	16.5064	28	Non-small cell lung cancer	AKT1;AKT2;ARAF;BAD;CASP9;CDK6;CDKN2A;E2F1;GRB2;HRAS;PDPK1;PIK3CD;PIK3CG;PLCG1;PLCG2;PRKCA;PRKCB;MAPK1;MAPK3;MAP2K1;MAP2K2;RAF1;RXRA;RXRB;RXRG;SOS2;RASSF1;PIK3R5
5221	0.00349153	17.4234	29	Acute myeloid leukemia	AKT1;AKT2;ARAF;BAD;CEBPA;EIF4EBP1;MTOR;GRB2;HRAS;PIM1;PIK3CD;PIK3CG;PPARD;MAPK1;MAPK3;MAP2K1;MAP2K2;RAF1;RARA;RPS6KB2;SOS2;SPI1;STAT3;STAT5A;STAT5B;TCF7;PIM2;PIK3R5;LEF1
564	0.00685918	24.4539	37	Glycerophospholipid metabolism	CHKA;CHKB;DGKQ;LCAT;PCYT1A;PLA2G2A;PLA2G5;PLD2;PCYT2;TAZ;PLA2G6;DGKZ;PLPP1;JMJD7-PLA2G4B;PGS1;PTDSS1;LPCAT3;PEMT;CDIPT;AGPAT2;LYPLA2;PISD;PLA2G2D;CRLS1;AGPAT3;AGPAT4;ADPRM;MBOAT7;LPCAT1;PTDSS2;PLA2G12A;GPAT4;PLB1;MBOAT1;PHOSPHO1;LPCAT4;PLA2G2C
240	0.0068969	30.2617	44	Pyrimidine metabolism	POLR3D;ENTPD1;ENTPD6;ENTPD5;CTPS1;DCTD;DHODH;DTYMK;DUT;TYMP;ITPA;NME3;NME4;PNP;NT5E;POLD1;POLE;POLR2C;POLR2E;POLR2F;POLR2H;POLR2J;TK2;UPP1;POLR1C;ENTPD4;NME6;TXNRD2;POLR3C;POLR3A;NT5C;POLR1D;UPB1;POLE3;UCKL1;NT5M;POLD4;UCK1;POLR3GL;CANT1;UPP2;POLR3H;POLR2J2;POLR2J3
5140	0.0115594	22.0085	33	Leishmaniasis	CR1;ELK1;FCGR2A;FOS;HLA-DMA;HLA-DMB;HLA-DPA1;IFNGR2;IL1B;IL10;IL12B;IRAK1;ITGB2;JAK1;JUN;MYD88;NCF2;NFKBIA;NFKBIB;NOS2;PRKCB;MAPK1;MAPK3;MAPK11;MAPK13;STAT1;TGFB1;TGFB3;TLR2;FCGR2C;TAB1;TAB2;NCF1
4910	0.0115594	42.183	57	Insulin signaling pathway	ACACB;AKT1;AKT2;ARAF;BAD;CRK;EIF4EBP1;ELK1;MTOR;MKNK2;GRB2;RAPGEF1;GYS1;HK3;HRAS;INSR;LIPE;PCK2;PDE3B;PDPK1;PHKA2;PHKG1;PHKG2;PIK3CD;PIK3CG;PPP1R3D;PRKAB1;PRKAB2;PRKACA;PRKAG1;PRKAR2A;PRKCZ;MAPK1;MAPK3;MAPK9;MAP2K1;MAP2K2;PTPN1;PYGB;PYGL;PYGM;RAF1;RPS6KB2;SOS2;SREBF1;MKNK1;IRS2;SOCS2;SOCS3;FLOT1;SH2B2;EXOC7;RHOQ;PIK3R5;PRKAG2;INPP5K;G6PC2
4620	0.0115594	31.1787	44	Toll-like receptor signaling pathway	AKT1;AKT2;CD14;CD86;MAP3K8;CTSK;FOS;IFNA5;IL1B;IL12B;IRAK1;IRF3;IRF5;IRF7;JUN;CXCL9;MYD88;NFKBIA;PIK3CD;PIK3CG;MAPK1;MAPK3;MAPK11;MAPK9;MAPK13;MAP2K1;MAP2K2;MAP2K7;RAC1;STAT1;TLR2;TLR5;TRAF3;RIPK1;FADD;TLR6;TAB1;TAB2;PIK3R5;TLR7;TLR8;TLR9;TOLLIP;TICAM2
510	0.0122331	14.978	24	N-Glycan biosynthesis	DDOST;DPAGT1;MAN1A1;MAN2A2;MGAT1;MGAT2;MGAT5;RPN1;RPN2;MOGS;B4GALT3;B4GALT2;DPM2;ALG3;MAN1B1;MGAT4B;DOLK;GANAB;ALG1;MAN1C1;DOLPP1;ALG12;ALG2;RFT1
562	0.0125212	17.4234	27	Inositol phosphate metabolism	IMPA2;INPP5A;INPPL1;ITPK1;ITPKB;ALDH6A1;OCRL;PIK3CD;PIK3CG;PI4KA;PI4KB;PIP4K2A;PLCB2;PLCD1;PLCG1;PLCG2;PIP5K1A;CDIPT;PLCB1;PIP5K1C;ISYNA1;INPP5K;PI4K2A;INPP5E;IPPK;PLCD4;PIP5KL1
5213	0.0127221	15.895	25	Endometrial cancer	AKT1;AKT2;APC;ARAF;BAD;CASP9;CDH1;ELK1;GRB2;HRAS;ILK;PDPK1;PIK3CD;PIK3CG;MAPK1;MAPK3;MAP2K1;MAP2K2;RAF1;SOS2;TCF7;AXIN1;AXIN2;PIK3R5;LEF1
4722	0.0162404	38.8206	52	Neurotrophin signaling pathway	ABL1;AKT1;AKT2;ATF4;BAD;BAX;CAMK2G;CRK;CSK;GRB2;RAPGEF1;HRAS;IRAK1;IRAK2;JUN;MAP3K1;MAP3K3;MAP3K5;NFKBIA;NFKBIB;NFKBIE;NTRK1;NTRK3;PIK3CD;PIK3CG;PLCG1;PLCG2;PRKCD;MAPK1;MAPK3;MAPK11;MAPK9;MAPK13;MAP2K1;MAP2K2;MAP2K7;PSEN1;PSEN2;RAC1;RAF1;RPS6KA1;SOS2;IRS2;RPS6KA4;MAPKAPK2;MAGED1;SH2B3;SH2B2;ZNF274;PRDM4;PIK3R5;SH2B1
520	0.0168691	14.6723	23	Amino sugar and nucleotide sugar metabolism	CHIT1;CYB5R3;GALE;GALK1;GALT;GMDS;HEXB;HK3;MPI;PGM1;PMM1;PMM2;RENBP;TSTA3;GNE;GMPPB;AMDHD2;CYB5R1;PGM2;NAGK;UXS1;UAP1L1;FUK
3410	0.0180455	10.0872	17	Base excision repair	APEX1;LIG1;LIG3;MPG;MUTYH;NTHL1;OGG1;POLD1;POLE;XRCC1;PARP2;PARP3;SMUG1;POLL;POLE3;POLD4;NEIL1
5210	0.0193901	18.9518	28	Colorectal cancer	AKT1;AKT2;APC;ARAF;BAD;BAX;CASP9;FOS;JUN;PIK3CD;PIK3CG;MAPK1;MAPK3;MAPK9;MAP2K1;RAC1;RAC2;RAC3;RAF1;RALGDS;TCF7;TGFB1;TGFB3;TGFBR2;AXIN1;AXIN2;PIK3R5;LEF1
4122	0.0208722	3.05674	7	Sulfur relay system	MPST;TST;NFS1;MOCS3;TRMU;CTU1;CTU2
4920	0.0208722	20.7858	30	Adipocytokine signaling pathway	ACACB;AKT1;AKT2;CPT1B;MTOR;NFKBIA;NFKBIB;NFKBIE;PCK2;PRKAB1;PRKAB2;PRKAG1;PRKCQ;MAPK9;RXRA;RXRB;RXRG;SLC2A1;STAT3;STK11;TNFRSF1B;TRAF2;IRS2;TRADD;SOCS3;CAMKK2;ADIPOR1;PRKAG2;G6PC2;CAMKK1
5131	0.0259375	18.6461	27	Shigellosis	ABL1;ACTG1;RHOG;CRK;CSK;HCLS1;ITGA5;NFKBIA;NFKBIB;MAPK1;MAPK3;MAPK11;MAPK9;MAPK13;RAC1;U2AF1;UBE2D2;VCL;ELMO1;ARPC1B;WASF2;NOD1;MAD2L2;ARPC1A;NOD2;ARPC5L;PFN4
532	0.0259375	6.72483	12	Glycosaminoglycan biosynthesis - chondroitin sulfate / dermatan sulfate	UST;B4GALT7;B3GAT3;DSE;CHST11;CHST15;CHPF2;CHST12;CHST7;XYLT1;XYLT2;B3GALT6
604	0.0266279	4.58511	9	Glycosphingolipid biosynthesis - ganglio series	GLB1;HEXB;ST3GAL1;ST3GAL2;B3GALT4;ST3GAL5;SLC33A1;ST6GALNAC6;ST6GALNAC3
4141	0.0309726	50.4362	63	Protein processing in endoplasmic reticulum	AMFR;ATF4;BAK1;BAX;CAPN1;CAPN2;ATF6B;DDIT3;DDOST;DNAJB2;HSPA1B;HSPA6;DNAJB1;MAN1A1;MAP3K5;NFE2L2;P4HB;MAPK9;MAP2K7;RPN1;RPN2;RRBP1;SEC13;TRAF2;UBE2D1;UBE2D2;UBE2G1;UBE2G2;UFD1;XBP1;MOGS;MBTPS1;SEC24C;HERPUD1;PREB;STUB1;SEC24B;SEC23B;LMAN2;CKAP4;MAN1B1;GANAB;HSPBP1;PPP1R15A;FBXO6;SEC61A1;UBQLN2;UBQLN1;ERO1A;UBQLN3;DERL2;UBE2D4;DNAJB12;NPLOC4;EDEM2;NSFL1C;MAN1C1;DNAJC1;SIL1;TXNDC5;UBE2J2;UBQLNL;EIF…
5110	0.0309726	16.5064	24	Vibrio cholerae infection	ACTG1;ADCY3;ADCY9;ARF1;ATP6V0C;ATP6V0B;ATP6V1G2;GNAS;KCNQ1;PLCG1;PLCG2;PRKACA;PRKCA;PRKCB;ATP6V0E1;ATP6V0D1;ATP6V1F;TCIRG1;ATP6V0A2;SEC61A1;ERO1A;ATP6V1E2;ATP6V0E2;ATP6V0D2
4146	0.031097	24.1482	33	Peroxisome	ABCD1;CAT;ECH1;EPHX2;HMGCL;IDH2;MPV17;NOS2;PEX1;PEX6;PEX10;PEX12;PHYH;PEX19;ABCD4;PEX5;XDH;ACOX3;PEX11B;PEX16;ACOT8;DHRS4;PXMP4;MLYCD;HAO2;PIPOX;PEX26;FAR2;PECR;PEX11G;PAOX;GSTK1;NUDT19
4660	0.033699	33.0128	43	T cell receptor signaling pathway	AKT1;AKT2;CD4;CD8A;MAP3K8;FOS;FYN;GRB2;HRAS;IL10;JUN;LCK;LCP2;NFATC3;NFKBIA;NFKBIB;NFKBIE;PIK3CD;PIK3CG;PLCG1;PPP3CC;PRKCQ;MAPK1;MAPK3;MAPK11;MAPK9;MAPK13;MAP2K1;MAP2K2;MAP2K7;RAF1;SOS2;VAV1;VAV2;ZAP70;NCK2;BCL10;MAP3K14;RASGRP1;VAV3;PIK3R5;LAT;CARD11
785	0.0380373	0.917022	3	Lipoic acid metabolism	LIAS;LIPT1;LIPT2
230	0.0394099	49.5192	61	Purine metabolism	ADA;ADCY2;ADCY3;ADCY7;ADCY9;AK1;AK2;AMPD2;AMPD3;POLR3D;ENTPD1;ENTPD6;ENTPD5;DGUOK;GMPR;GUCY2F;IMPDH1;IMPDH2;ITPA;NME3;NME4;PNP;NT5E;PDE3B;PDE6D;PDE6G;PDE8A;PDE6B;PGM1;POLD1;POLE;POLR2C;POLR2E;POLR2F;POLR2H;POLR2J;XDH;PDE8B;POLR1C;ENTPD4;NME6;POLR3C;POLR3A;NUDT5;PDE7B;NT5C;POLR1D;GMPR2;POLE3;PGM2;ADCY10;NT5M;ADPRM;POLD4;PRUNE1;POLR3GL;CANT1;POLR3H;ADCY4;POLR2J2;POLR2J3
3020	0.0400171	8.86454	14	RNA polymerase	POLR3D;POLR2C;POLR2E;POLR2F;POLR2H;POLR2J;POLR1C;POLR3C;POLR3A;POLR1D;POLR3GL;POLR3H;POLR2J2;POLR2J3
4012	0.0400171	26.5936	35	ErbB signaling pathway	ABL1;AKT1;AKT2;ARAF;AREG;BAD;CAMK2G;CDKN1B;CRK;HBEGF;EIF4EBP1;ELK1;MTOR;GRB2;HRAS;JUN;PIK3CD;PIK3CG;PLCG1;PLCG2;PRKCA;PRKCB;MAPK1;MAPK3;MAPK9;MAP2K1;MAP2K2;MAP2K7;RAF1;RPS6KB2;SOS2;STAT5A;STAT5B;NCK2;PIK3R5
4210	0.0400171	26.5936	35	Apoptosis	AKT1;AKT2;BAD;BAX;BID;CAPN1;CAPN2;CASP9;CSF2RB;DFFA;DFFB;ENDOG;IL1B;IRAK1;IRAK2;MYD88;NFKBIA;NTRK1;PIK3CD;PIK3CG;PPP3CC;PRKACA;PRKAR2A;TRAF2;TRADD;RIPK1;FADD;TNFRSF10D;TNFRSF10C;TNFRSF10B;TNFRSF10A;CFLAR;MAP3K14;AIFM1;PIK3R5
4730	0.0400171	21.3972	29	Long-term depression	ARAF;GNA11;GNA12;GNAQ;GNAS;GRIA1;HRAS;IGF1R;ITPR3;LYN;NOS1;PLA2G2A;PLA2G5;PLCB2;PPP2CB;PPP2R1A;PRKCA;PRKCB;MAPK1;MAPK3;MAP2K1;MAP2K2;RAF1;PLA2G6;JMJD7-PLA2G4B;PLCB1;PLA2G2D;PLA2G12A;PLA2G2C
760	0.0400171	7.33617	12	Nicotinate and nicotinamide metabolism	AOX1;PNP;NT5E;NMNAT2;QPRT;NT5C;NMRK1;NADSYN1;NT5M;NMNAT1;NADK;NMNAT3
4320	0.0400171	7.33617	12	Dorso-ventral axis formation	ETS2;ETV6;GRB2;NOTCH1;NOTCH4;MAPK1;MAPK3;MAP2K1;SOS2;PIWIL1;SPIRE1;SPIRE2
531	0.0400171	5.8078	10	Glycosaminoglycan degradation	ARSB;GLB1;GUSB;HEXB;IDUA;NAGLU;SGSH;HYAL3;HYAL2;HPSE
5120	0.0427285	20.7858	28	Epithelial cell signaling in Helicobacter pylori infection	ATP6V0C;ATP6V0B;ATP6V1G2;CSK;HBEGF;CXCR1;JUN;LYN;NFKBIA;PLCG1;PLCG2;MAPK11;MAPK9;MAPK13;RAC1;ATP6V0E1;MAP3K14;ATP6V0D1;ATP6V1F;TCIRG1;NOD1;ATP6V0A2;GIT1;JAM3;ATP6V1E2;IGSF5;ATP6V0E2;ATP6V0D2
52	0.0427285	8.25319	13	Galactose metabolism	AKR1B1;GAA;GALE;GALK1;GALT;GLB1;HK3;PFKL;PFKP;PGM1;B4GALT2;PGM2;G6PC2
5020	0.0427285	10.6986	16	Prion diseases	BAX;C1QB;C7;C8A;C8B;ELK1;FYN;IL1B;NOTCH1;PRKACA;MAPK1;MAPK3;MAP2K1;MAP2K2;PRNP;STIP1
511	0.0449397	5.19646	9	Other glycan degradation	FUCA1;GBA;GLB1;HEXB;MAN2C1;MAN2B1;MAN2B2;ENGASE;HEXD
Down-regulated KEGG pathways in PD after 6 months
3010	2.91e-46	2.977	47	Ribosome	FAU;RPL10A;RPL7A;RPL11;RPL12;RPL18;RPL22;RPL23A;RPL24;RPL26;RPL30;RPL27A;RPL28;RPL29;RPL31;RPL32;RPL34;RPL35A;RPL36AL;RPL37;RPL37A;RPL38;RPL39;RPLP1;RPLP2;RPS3;RPS4X;RPS6;RPS8;RPS11;RPS12;RPS13;RPS15A;RPS18;RPS19;RPS20;RPS21;RPS23;RPS25;RPS26;RPS27;RPS27A;RPS28;RPS29;UBA52;RPL35;RPL36
190	8.57e-36	4.31828	46	Oxidative phosphorylation	ATP5F1A;ATP5F1D;ATP5F1E;ATP5MC1;ATP5MC2;ATP5MC3;ATP5ME;ATP5PF;ATP6V1C1;ATP5PO;COX4I1;COX5B;COX6A1;COX6B1;COX6C;COX7A2;COX8A;COX3;NDUFA1;NDUFA2;NDUFA3;NDUFA4;NDUFA9;NDUFAB1;NDUFB2;NDUFB3;NDUFB6;NDUFB7;NDUFB8;NDUFB9;NDUFB10;NDUFC2;NDUFS5;NDUFS6;UQCRB;UQCRH;COX5A;ATP5MF;ATP5PD;ATP5MG;UQCR11;UQCRQ;UQCR10;NDUFB11;NDUFA12;NDUFA11
5012	1.04e-33	4.25285	44	Parkinson's disease	ATP5F1A;ATP5F1D;ATP5F1E;ATP5MC1;ATP5MC2;ATP5MC3;ATP5PF;ATP5PO;COX4I1;COX5B;COX6A1;COX6B1;COX6C;COX7A2;COX8A;COX3;NDUFA1;NDUFA2;NDUFA3;NDUFA4;NDUFA9;NDUFAB1;NDUFB2;NDUFB3;NDUFB6;NDUFB7;NDUFB8;NDUFB9;NDUFB10;NDUFC2;NDUFS5;NDUFS6;PPID;UQCRB;UQCRH;COX5A;ATP5PD;UQCR11;PARK7;UQCRQ;UQCR10;NDUFB11;NDUFA12;NDUFA11
5016	1.72e-33	5.98671	50	Huntington's disease	ATP5F1A;ATP5F1D;ATP5F1E;ATP5MC1;ATP5MC2;ATP5MC3;ATP5PF;ATP5PO;COX4I1;COX5B;COX6A1;COX6B1;COX6C;COX7A2;COX8A;CREB1;HDAC2;COX3;NDUFA1;NDUFA2;NDUFA3;NDUFA4;NDUFA9;NDUFAB1;NDUFB2;NDUFB3;NDUFB6;NDUFB7;NDUFB8;NDUFB9;NDUFB10;NDUFC2;NDUFS5;NDUFS6;POLR2I;POLR2L;PPID;REST;SOD1;SOD2;UQCRB;UQCRH;COX5A;ATP5PD;UQCR11;UQCRQ;UQCR10;NDUFB11;NDUFA12;NDUFA11
5010	1.49e-27	5.46328	43	Alzheimer's disease	ATP5F1A;ATP5F1D;ATP5F1E;ATP5MC1;ATP5MC2;ATP5MC3;ATP5PF;ATP5PO;CALM1;COX4I1;COX5B;COX6A1;COX6B1;COX6C;COX7A2;COX8A;COX3;NDUFA1;NDUFA2;NDUFA3;NDUFA4;NDUFA9;NDUFAB1;NDUFB2;NDUFB3;NDUFB6;NDUFB7;NDUFB8;NDUFB9;NDUFB10;NDUFC2;NDUFS5;NDUFS6;UQCRB;UQCRH;COX5A;ATP5PD;UQCR11;UQCRQ;UQCR10;NDUFB11;NDUFA12;NDUFA11
4260	2.52e-07	2.519	14	Cardiac muscle contraction	COX4I1;COX5B;COX6A1;COX6B1;COX6C;COX7A2;COX8A;COX3;UQCRB;UQCRH;COX5A;UQCR11;UQCRQ;UQCR10
1100	0.00140524	36.9671	55	Metabolic pathways	ATP5F1A;ATP5F1D;ATP5F1E;ATP5MC1;ATP5MC2;ATP5MC3;ATP5ME;ATP5PF;ATP6V1C1;ATP5PO;COX4I1;COX5B;COX6A1;COX6B1;COX6C;COX8A;DAD1;GFPT1;HMGCR;IMPA1;COX3;NDUFA1;NDUFA2;NDUFA3;NDUFA4;NDUFA9;NDUFAB1;NDUFB2;NDUFB3;NDUFB6;NDUFB7;NDUFB8;NDUFB9;NDUFB10;NDUFC2;NDUFS5;NDUFS6;NME1;POLR2I;POLR2L;SCP2;UQCRB;UQCRH;COX5A;ATP5MF;ATP5PD;ATP5MG;UQCR11;UQCRQ;MAT2B;UQCR10;ALG5;DPM3;ETNK1;NDUFA11
3050	0.00390318	1.43943	6	Proteasome	PSMA3;PSMA5;PSMB6;PSMD4;SEM1;POMP
3440	0.0150147	0.915999	4	Homologous recombination	RPA1;RPA3;SSBP1;SEM1
3430	0.0377213	0.752428	3	Mismatch repair	RPA1;RPA3;SSBP1
3060	0.0377213	0.752428	3	Protein export	SRP19;SPCS2;SEC61G
